# Supplementary material
Source: MDPI journal article supplement (https://www.mdpi.com/2504-477X/7/5/204)
Supplement: s1 [file s1]

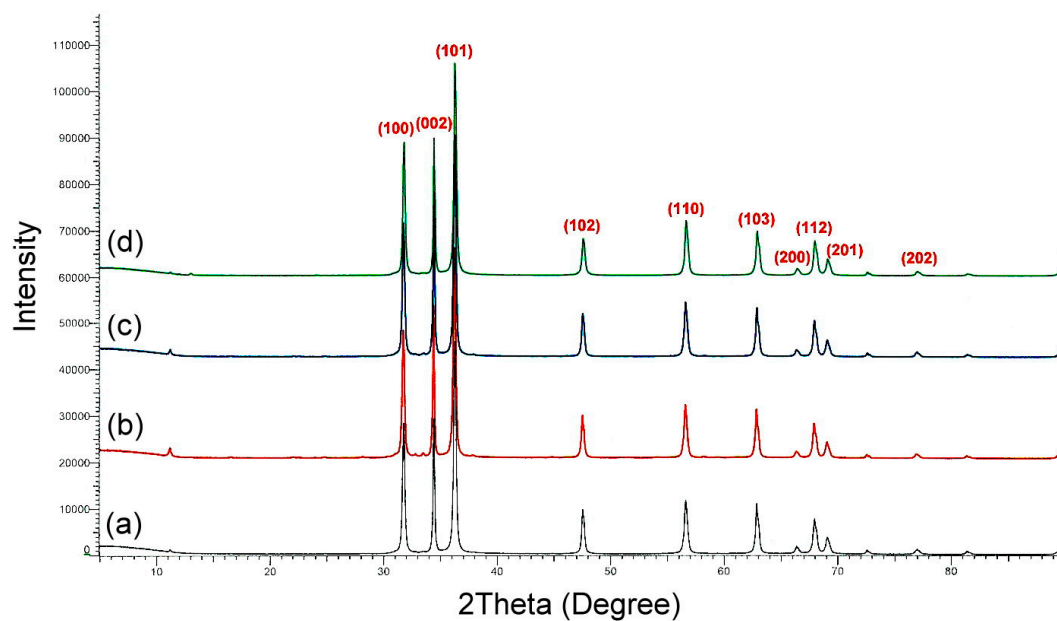

**Figure S1.** XRD crystal diffraction analysis of nano-ZnO at different the volumetric flow rate: (a) 0.0125 mL/s; (b) 0.020 mL/s; (c) 0.035 mL/s; (d) 0.065 mL/s.

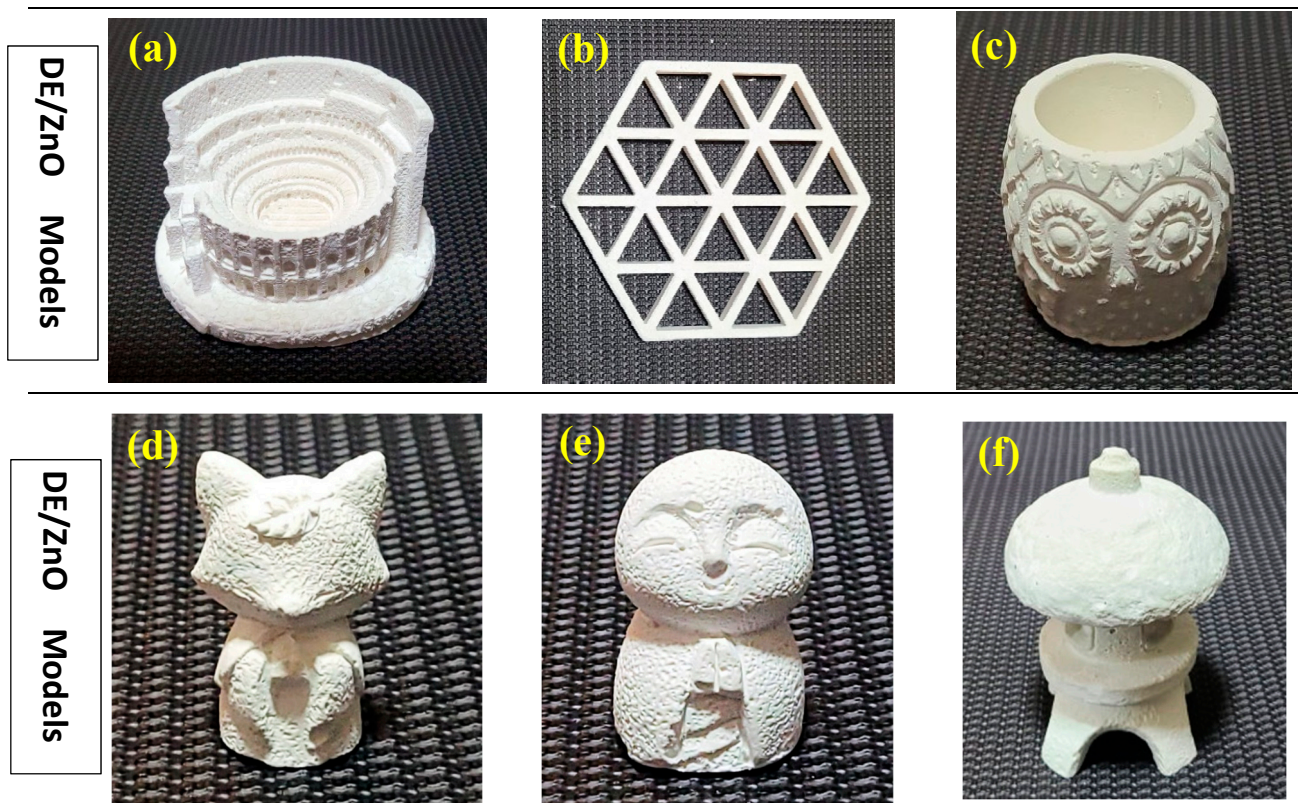

**Figure S2.** Replicated products of self-made porous DE/nano ZnO composite materials. (a) Roman arena; (b) lattice fence; (c) owl flowerpot; (d) fox decoration; (e) doll; (f) lantern landscape decoration.
